# Supplementary material
Source: publisher figshare collection journal article supplement (https://tandf.figshare.com/ndownloader/files/22520087)
Supplement: Supplementary file 1 [file 22520087]

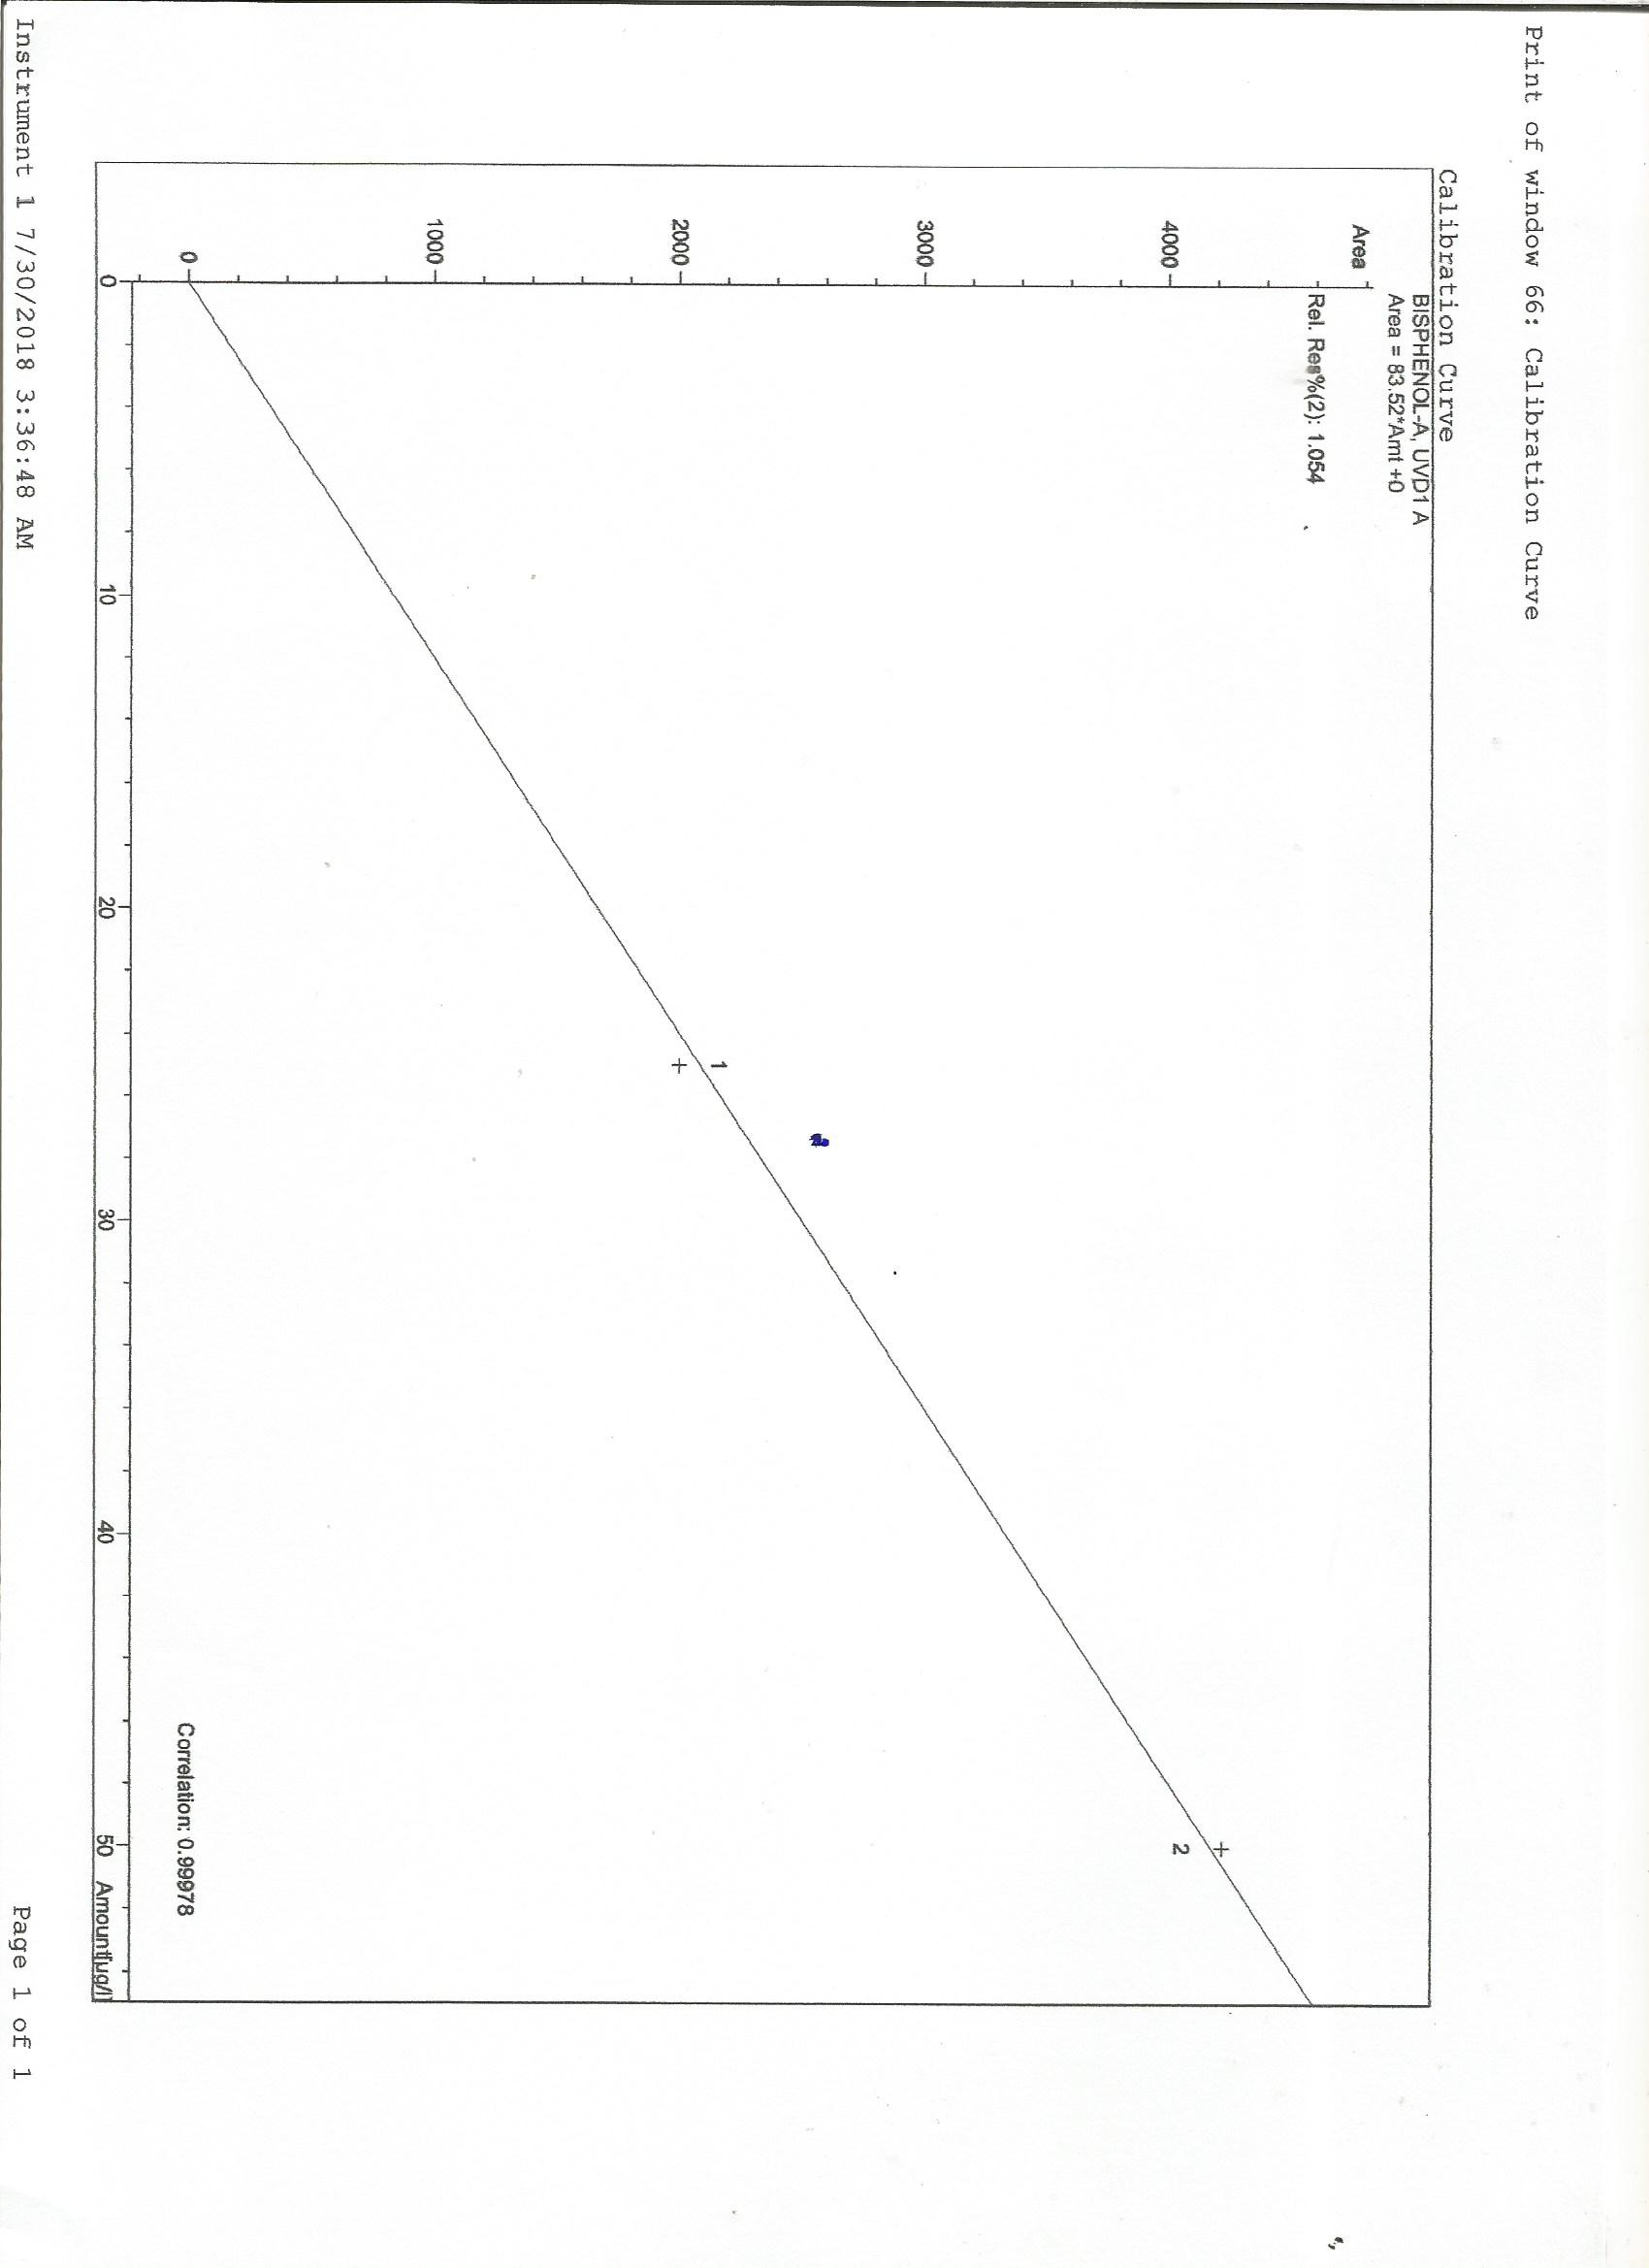


Suppl. 1: Calibration curve of the BPA standard with correlation coefficient


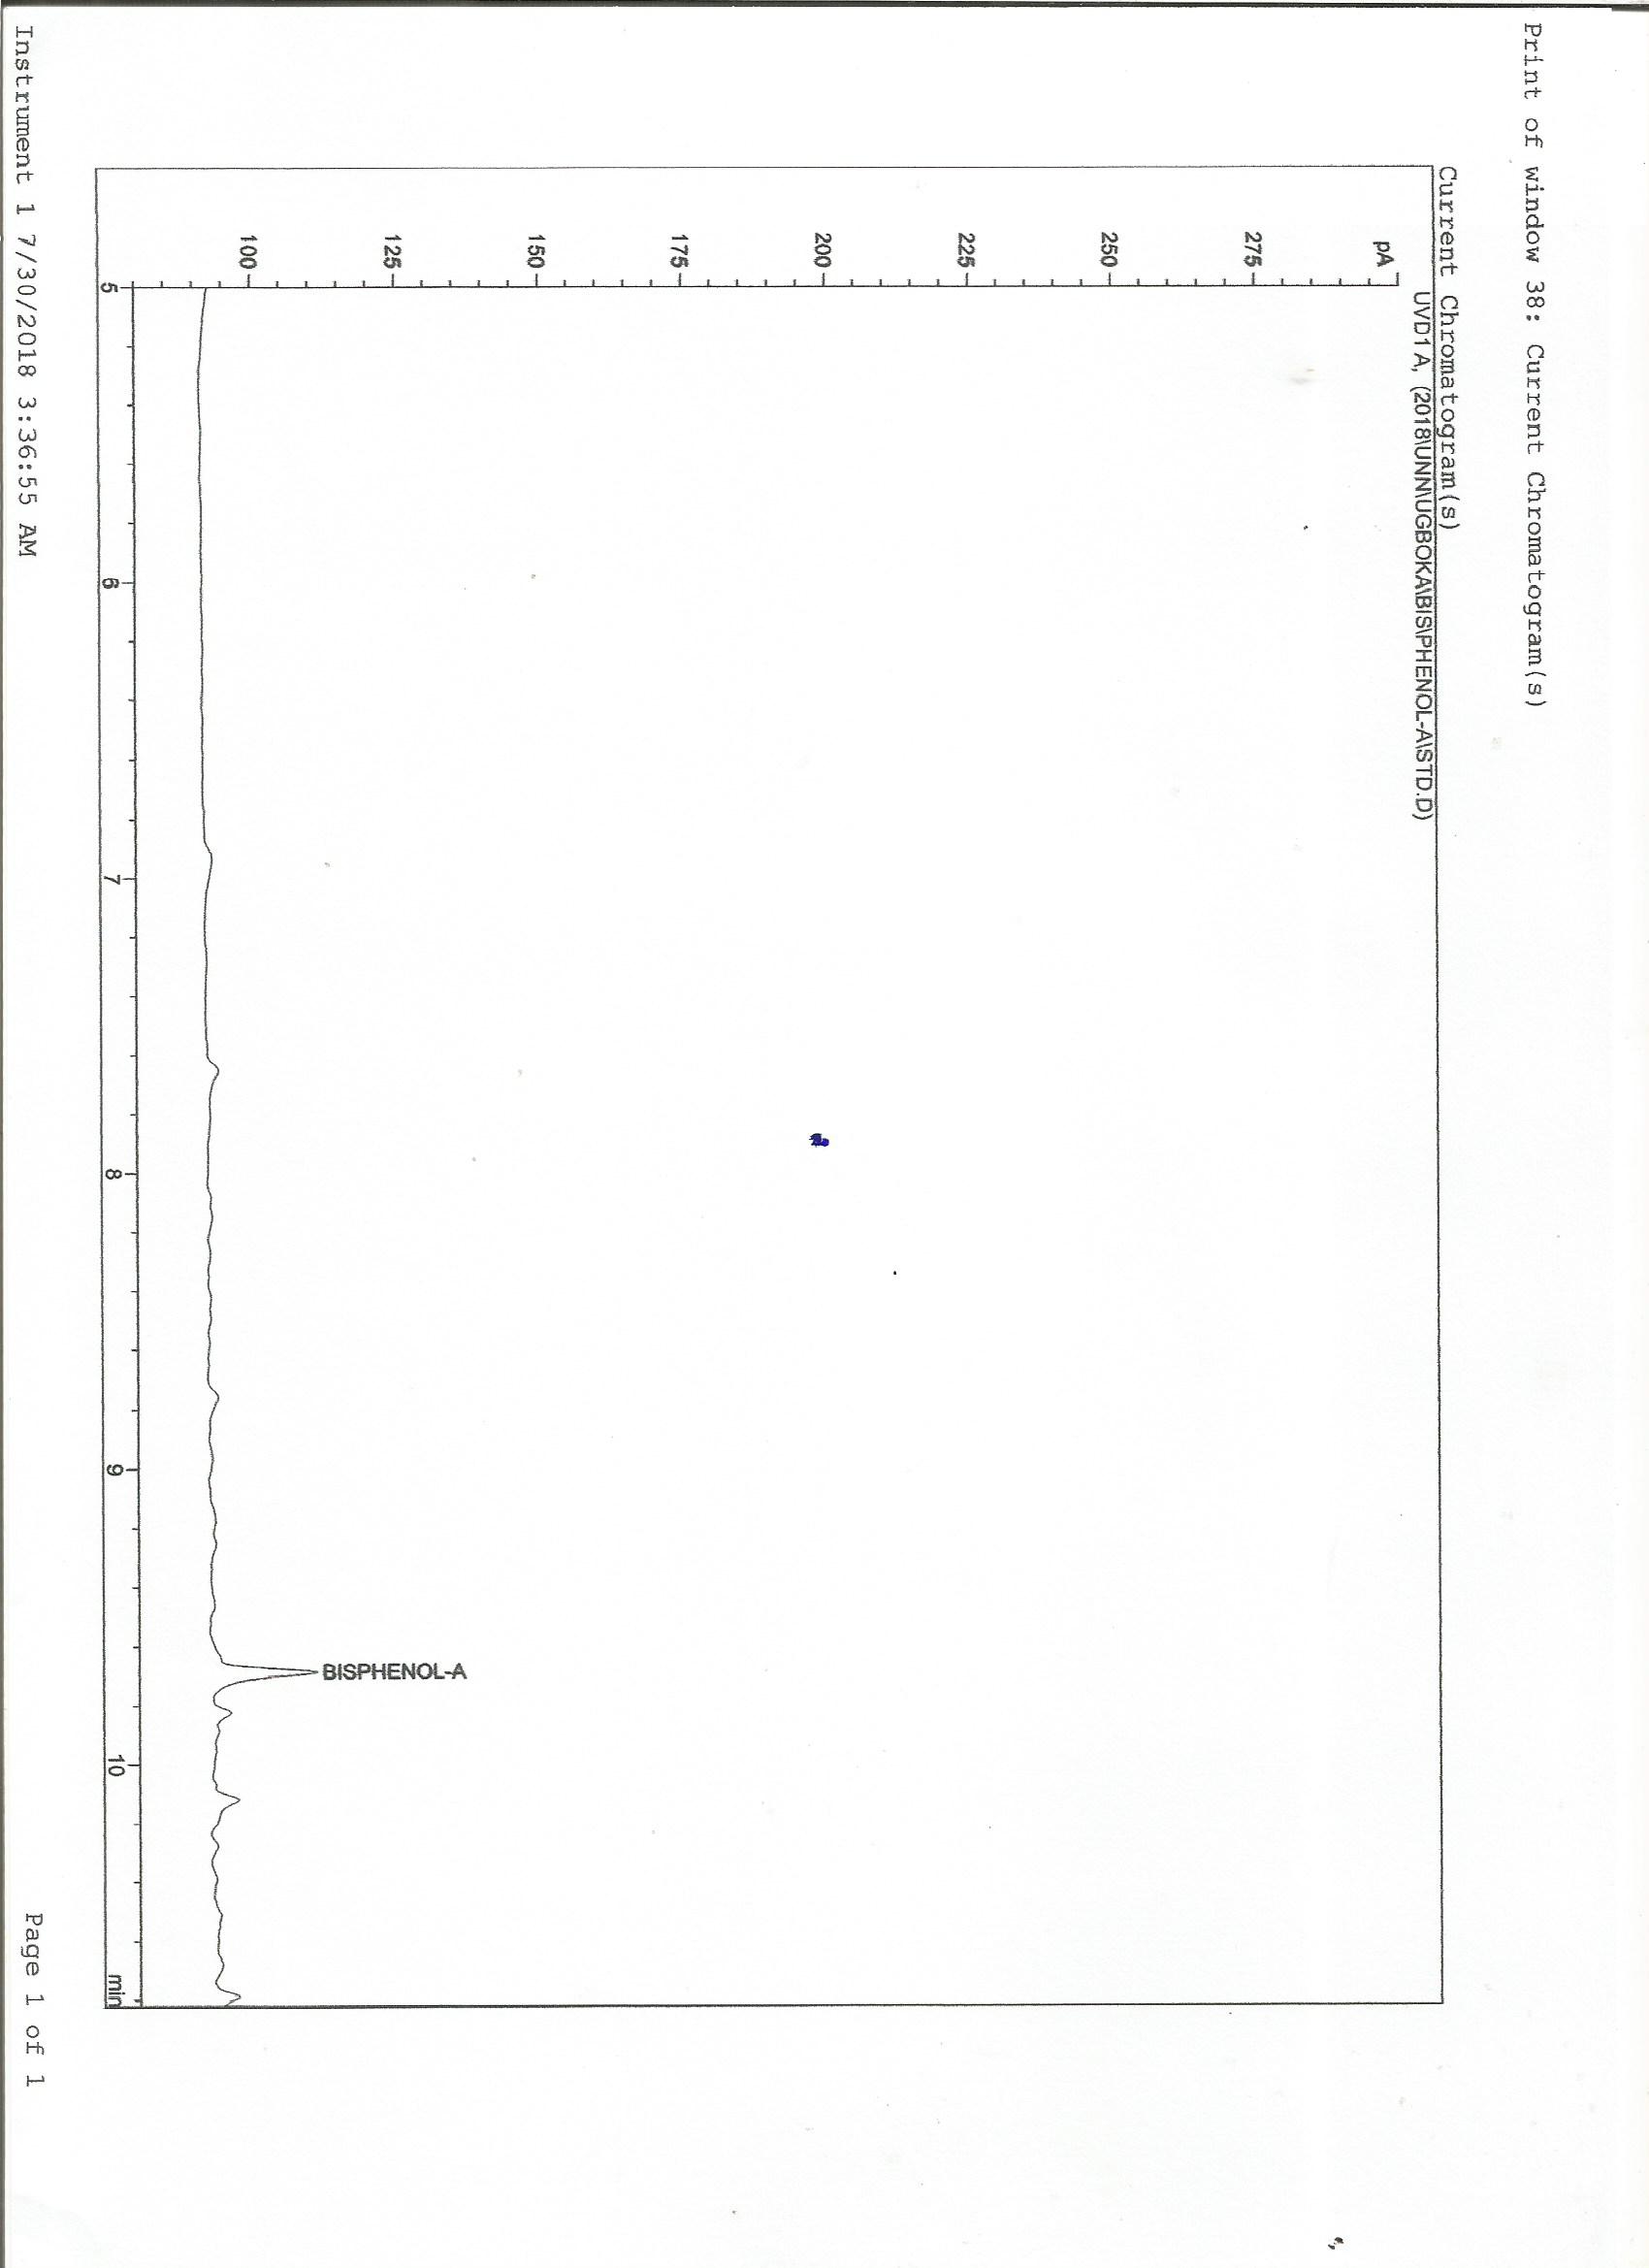


Suppl. 2: BPA standard chromatogram


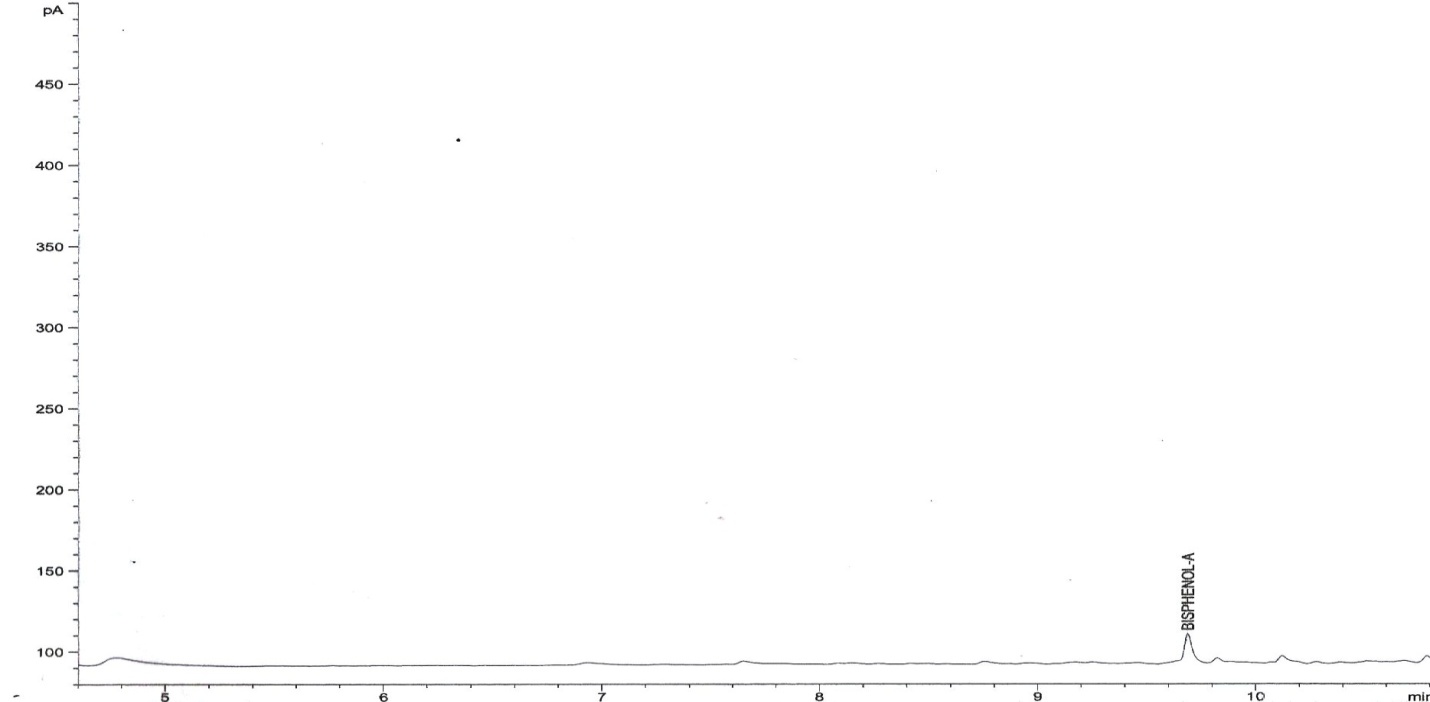


Suppl. 3a: Chromatogram of BPA from PC bottled water sample exposed to sunlight for 30 days


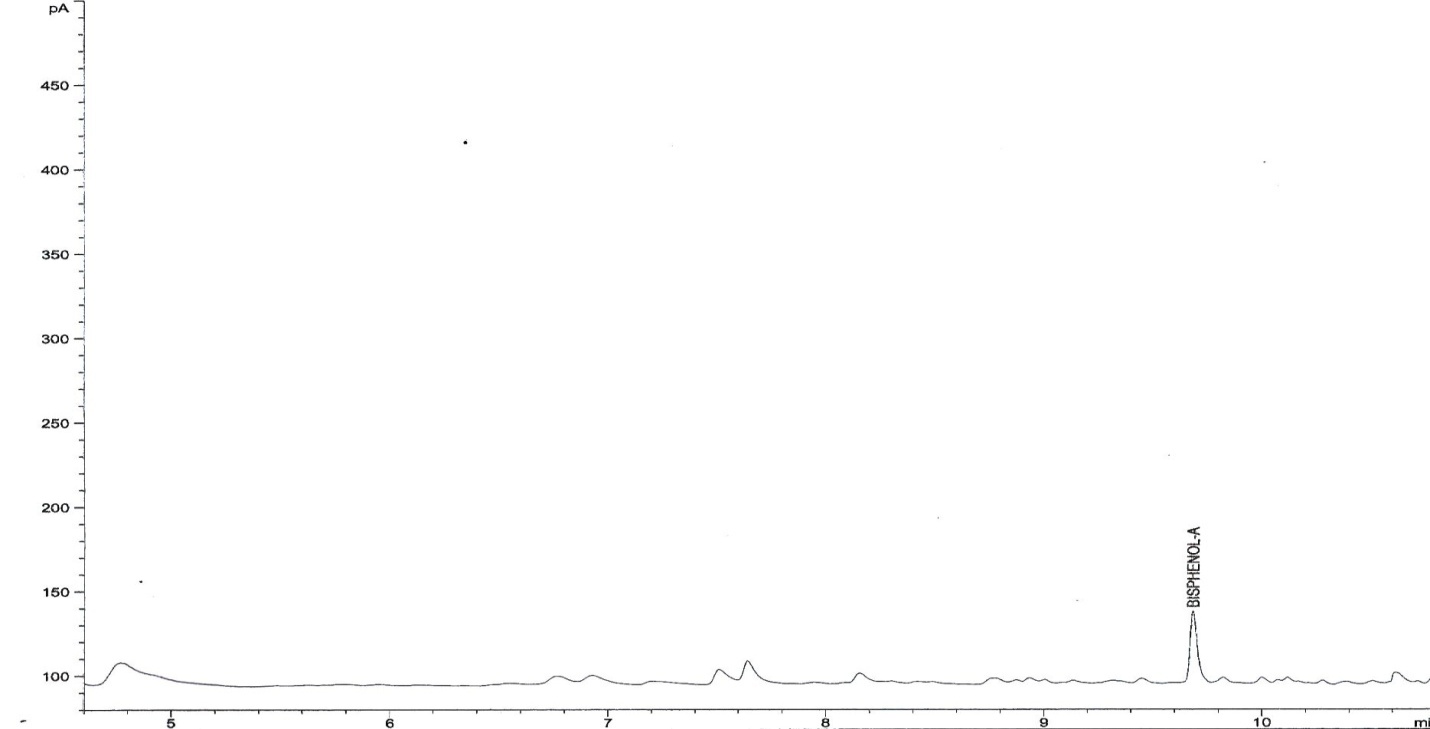


Suppl. 3b: Chromatogram of BPA from PC bottled water sample exposed to sunlight for 60 days
